# Supplementary material for: NiCo-embedded in hierarchically structured N-doped carbon nanoplates for the efficient electrochemical determination of ascorbic acid, dopamine, and uric acid
Source: Royal Society of Chemistry journal article supplement (doi:10.1039/c5ra10937j), 2015-01-01
Supplement: c5ra10937j1.pdf [file c5ra10937j1.pdf]

## Supporting Information

# NiCo-Embedded in Hierarchically Structured N-Doped Carbon Nanoplates for Efficiently Electrochemical Determination of Ascorbic acid, Dopamine, and Uric Acid

Xianglan Zhang,<sup>a</sup> Wenfu Yan,<sup>b</sup> Jianan Zhang,<sup>\*,a,c</sup> Yuanyuan Li,<sup>a</sup> Wanyu Tang,<sup>a</sup> Qun Xu<sup>\*,a</sup>

<sup>a</sup>College of Materials Science and Engineering, Zhengzhou University, Zhengzhou 450052, People's Republic of China

<sup>b</sup>State Key Laboratory of Inorganic Synthesis and Preparative Chemistry, College of Chemistry, Jilin University, Changchun 130012, People's Republic of China

<sup>c</sup>Key Laboratory of Advanced Energy Materials Chemistry (Ministry of Education), Nankai University, Tianjin 300071, People's Republic of China

\*Corresponding author E-mails: [qunxu@zzu.edu.cn](mailto:qunxu@zzu.edu.cn) (Qun Xu) and [zjn@zzu.edu.cn](mailto:zjn@zzu.edu.cn) (Jianan Zhang)

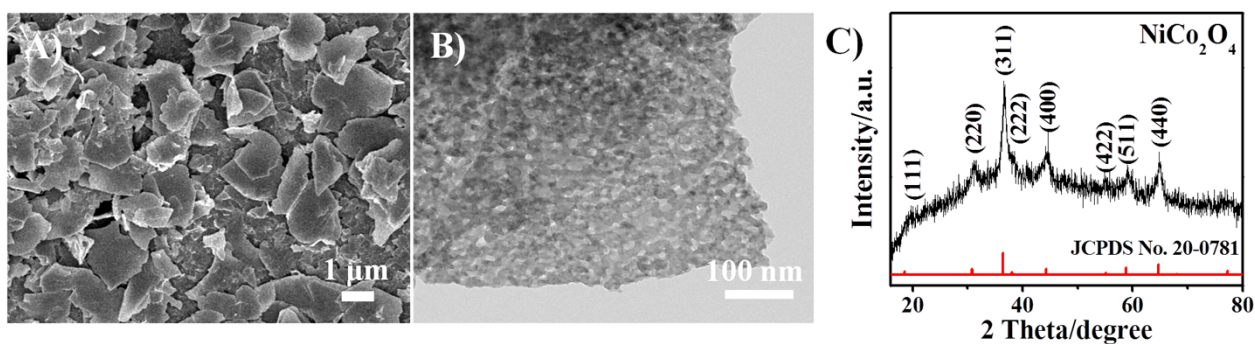

**Figure S1.** (A) SEM and (B) TEM images of NiCo<sub>2</sub>O<sub>4</sub> sheets. (C) XRD pattern of NiCo<sub>2</sub>O<sub>4</sub> sheets.

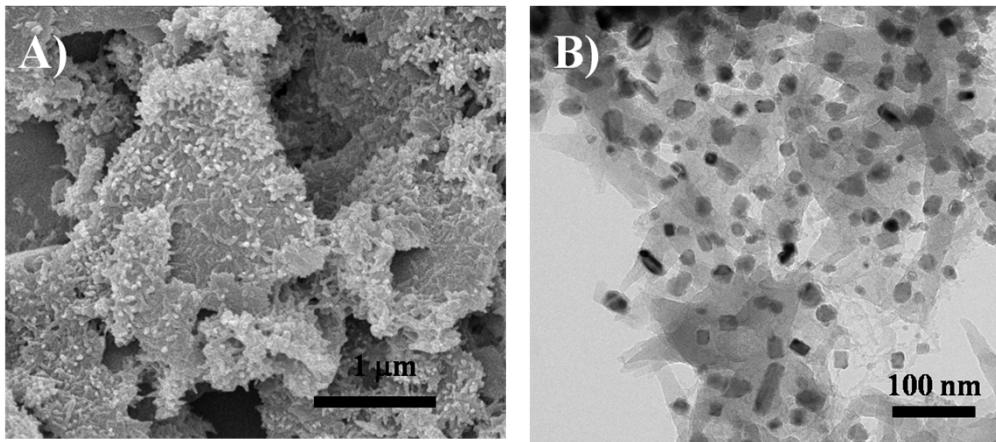

**Figure S2.** SEM and TEM images of NiCo-NPs-in-N/C nanoplates

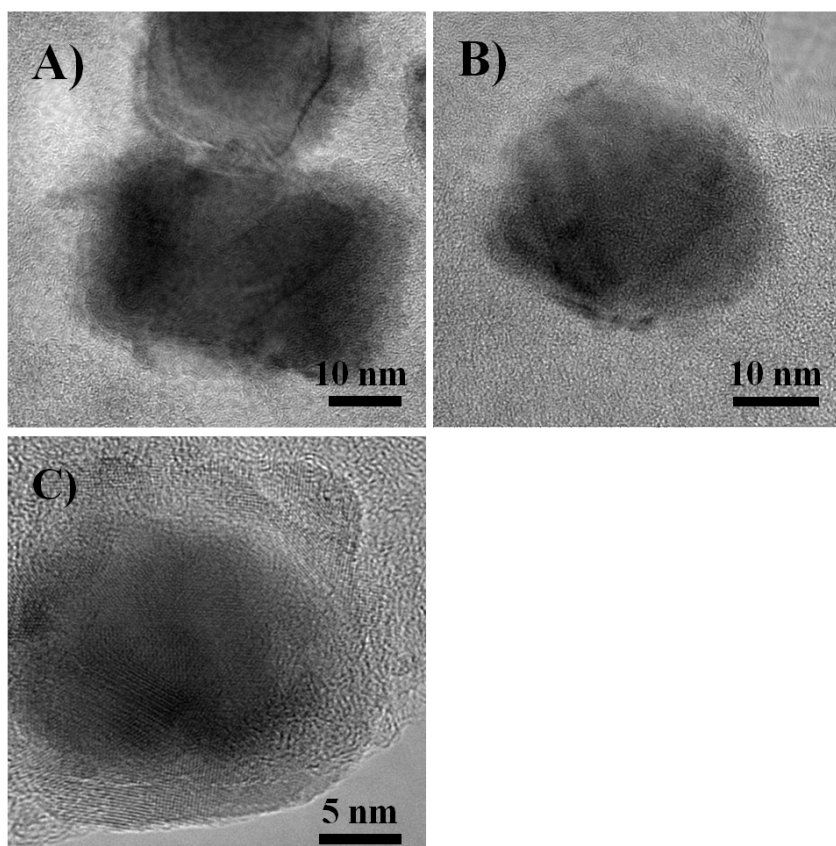

**Figure S3.** Large-magnified TEM images of NiCo-NPs-in-N/C.

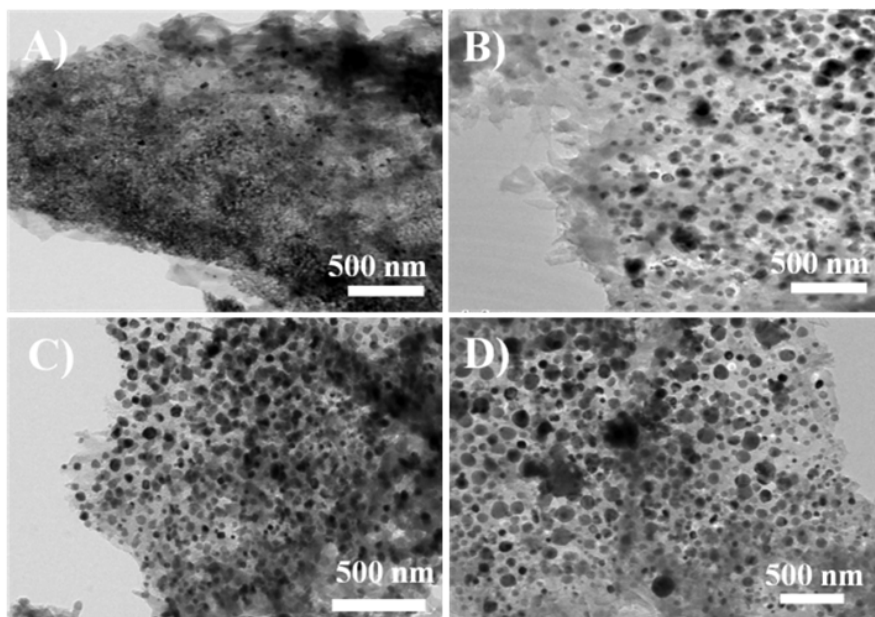

**Figure S4.** TEM images of NiCo<sub>2</sub>O<sub>4</sub>@PANI core-shell nanoplates carbonization at different temperature: (A) 350, (B) 550, (C) 750, and (D) 950 °C.

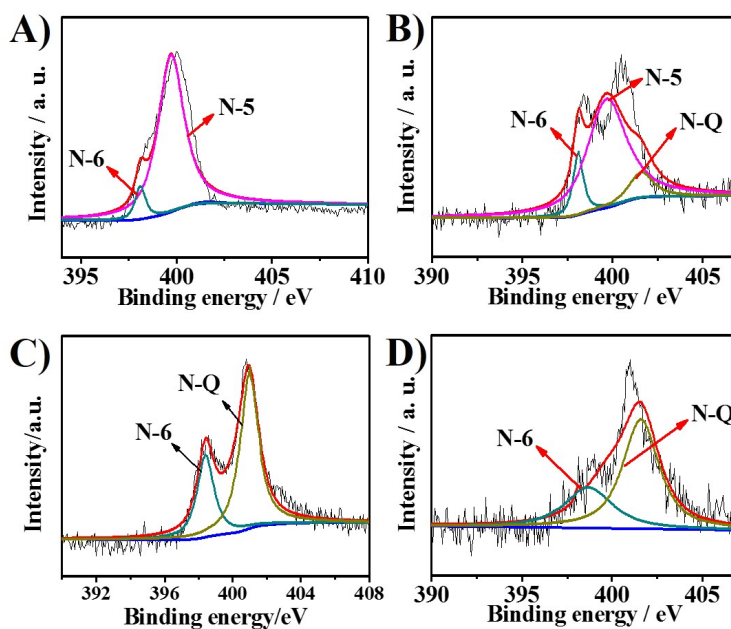

**Figure S5.** N1S spectrum of NiCo-NPs-in-N/C at different temperature: (A) 350, (B) 550, (C) 750, and (D) 950 °C.

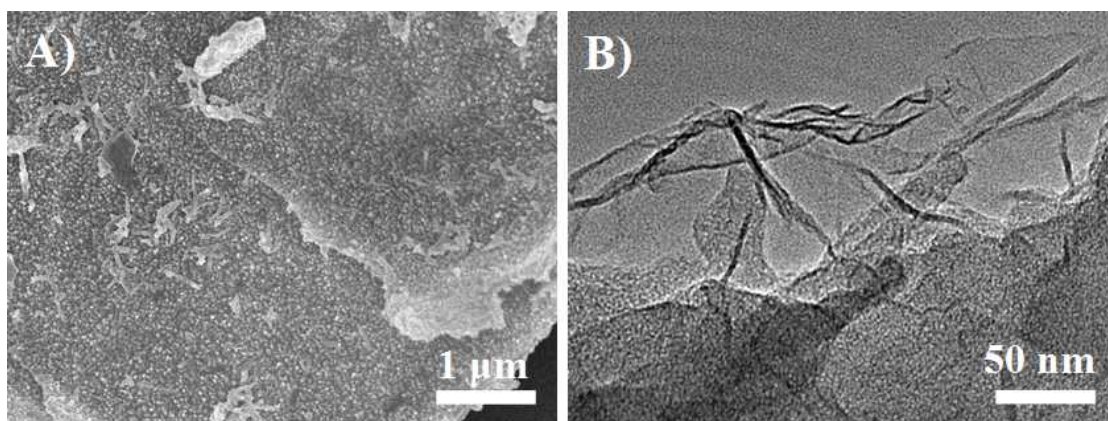

**Figure S6.** (A) SEM and (B) TEM images of graphene@N/C structure.

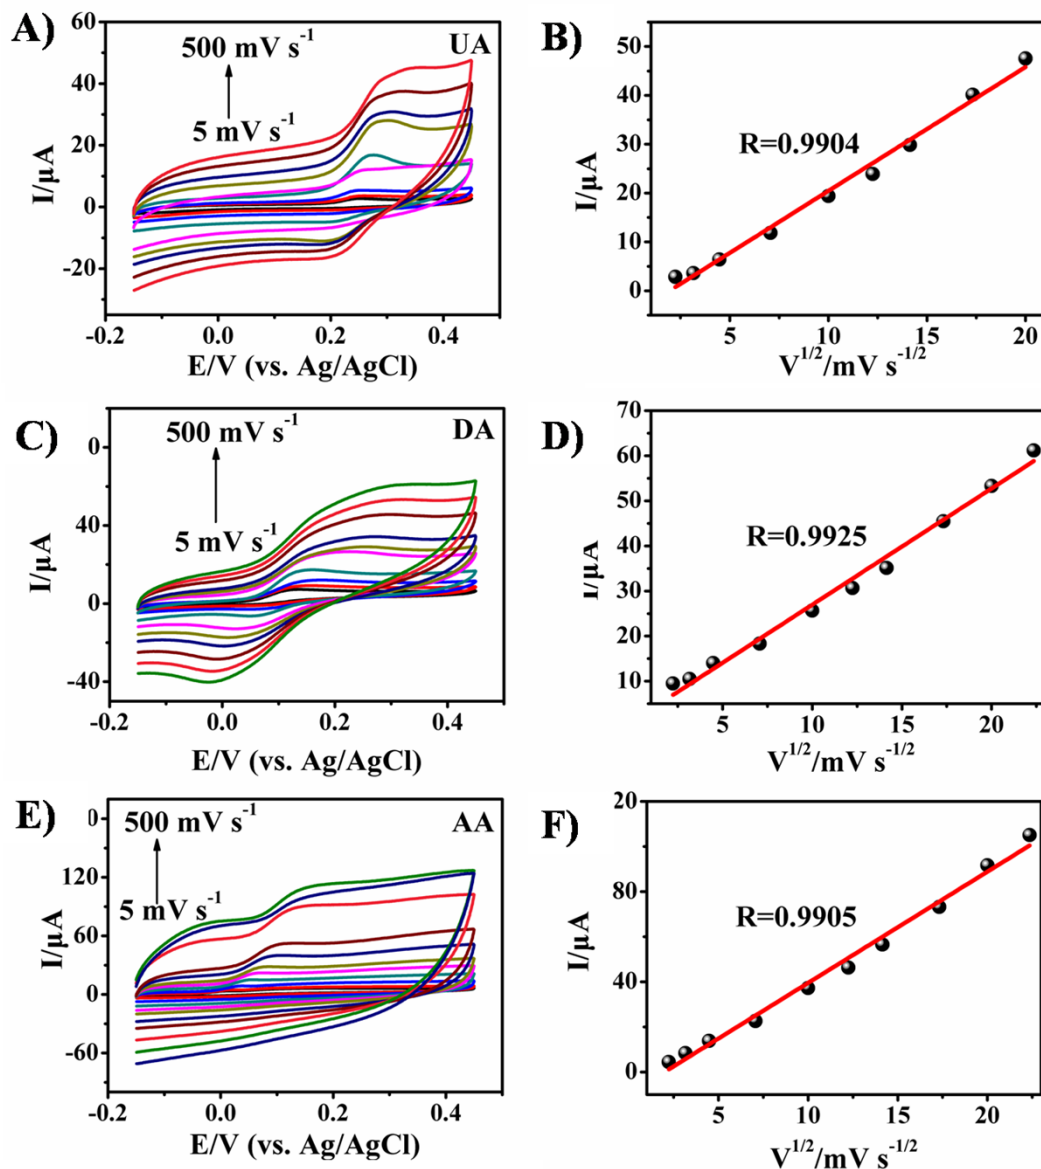

**Figure S7.** CVs at the NiCo-NPs-in-N/C electrode in 0.1 M PBS (PH 7.0) (A) containing 1.0 mM UA at different scan rate from 5 to 500 mV s<sup>-1</sup> and (B) plots of  $I_{\text{peak}}$  vs. scan rate, (C) containing 1.0 mM DA at different scan rate from 5 to 500 mV s<sup>-1</sup> and (D) plots of  $I_{\text{peak}}$  vs. scan rate, (E) containing 1.0 mM AA at different scan rate from 5 to 500 mV s<sup>-1</sup> and (F) plots of  $I_{\text{peak}}$  vs scan rate.

**Table S1** Comparison of the analytical performance of the different catalysts for the simultaneous determination of AA, DA and UA.

| Electrode materials                                            | Linear range ( $\mu\text{M}$ ) |         |          | Detection limit ( $\mu\text{M}$ ) |       |       | References |
|----------------------------------------------------------------|--------------------------------|---------|----------|-----------------------------------|-------|-------|------------|
|                                                                | AA                             | DA      | UA       | AA                                | DA    | UA    |            |
| Multi walled carbon nanotube modified carbon-ceramic electrode | 15–800                         | 0.5–100 | 0.55–90  | 7.71                              | 0.310 | 0.420 | 1          |
| 3DGF/ZnO NWAs                                                  | 0.5-40                         | 0.5-40  | 5-80     | 0.5                               | 0.5   | 5     | 2          |
| Cu nanoparticles–poly (sulfonazo III)                          | 0.30-730                       | 0.02-65 | 0.25-107 | 0.15                              | 0.01  | 0.1   | 3          |
| $\text{Fe}_3\text{O}_4/\text{r-GO}$                            | 160-7200                       | 0.4-3.5 | 4-20     | 20                                | 0.08  | 0.5   | 4          |
| Hollow nitrogen-doped carbon microspheres                      | 100-1000                       | 5-70    | 3-30     | 0.910                             | 0.020 | 0.040 | 5          |
| Nitrogen doped graphene                                        | 5-1300                         | 0.5-170 | 0.1-20   | 2.20                              | 0.25  | 0.045 | 6          |
| Nitrogen doped porous carbon nanopolyhedra                     | 80-2000                        | 0.5-30  | 4-50     | 0.740                             | 0.011 | 0.021 | 7          |
| Templated nanoporous carbons                                   | 80-1400                        | 0.4-60  | 10-70    | 0.012                             | 4.03  | 0.605 | 8          |
| NiCo-NPs-in-N/C                                                | 50-1500                        | 0.5-900 | 10-500   | 0.091                             | 0.080 | 0.014 | This work  |

**Table S2** Determination of AA, DA and UA in samples.

| Samples | Added (mM) | Found (mM) | Recovery (%) | RSD (%) <sub>n=5</sub> |
|---------|------------|------------|--------------|------------------------|
| AA      | 1.0        | 0.987      | 98.7         | 2.8                    |
| DA      | 0.05       | 0.0512     | 102.4        | 3.1                    |
| UA      | 0.1        | 0.102      | 102          | 3.3                    |

## References

- 1 B. Habibi and M.H. Poumaghi-Azar, *Electrochem. Acta*, 2010, **55**, 5492.
- 2 H. Y. Yue, S. Huang, J. Chang, C. Heo, F. Yao, S. Adhikari, F. Gunes, L. C. Liu, T. H. Lee, E. S. Oh, B. Li, J. J. Zhang, T. Q. Huy, N. V. Luan and Y. H. Lee, *ACS Nano*, 2014, **8**, 1639.

- 3 L. Zhang, W. J. Yuan and B. Q. Hou, *J. Electroanal. Chem.*, 2013, **689**, 135.
- 4 H. Teymourian, A. Salimi and S. Khezrian, *Biosens. Bioelectron.*, 2013, **49**, 1.
- 5 C. H. Xiao, X. C. Chu, Y. Yang, X. Li, X. H. Zhang and J. H. Chen, *Biosens. Bioelectron.*, 2011, **26**, 2934.
- 6 Z. H. Sheng, X. Q. Zheng, J. Y. Xu, W. J. Bao, F. B. Wang and X. H. Xia, *Biosens. Bioelectron.*, 2012, **34**, 125.
- 7 P. Gai, H. Zhang, Y. Zhang, W. Liu, G. Zhu, X. Zhang and J. Chen, *J. Mater. Chem. B*, 2013, **1**, 2742.
- 8 S. Zhou, H. Shi, X. Feng, K. Xue and W. Song, *Biosens. Bioelectron.*, 2013, **42**, 163.
